# Supplementary material for: Genomes of Thaumarchaeota from deep sea sediments reveal specific adaptations of three independently evolved lineages
Source: PubMed Central journal article supplement (PMC8397731; doi:10.1038/s41396-021-00962-6), 2021-04-01

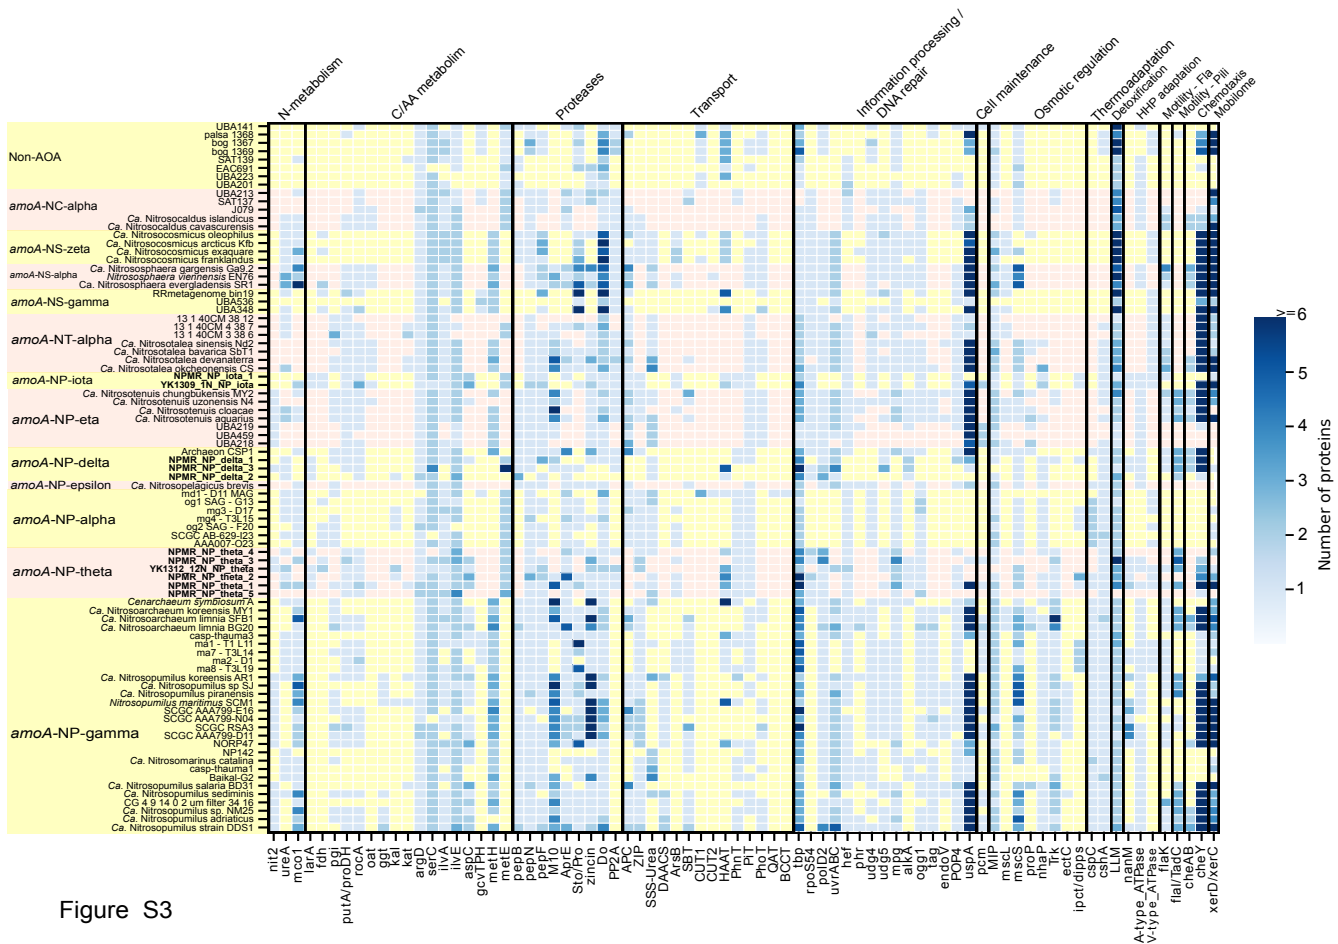

Supplement: 41396_2021_962_MOESM4_ESM.pdf [file 41396_2021_962_MOESM4_ESM.pdf]
