# Supplementary material for: Genomes of Thaumarchaeota from deep sea sediments reveal specific adaptations of three independently evolved lineages
Source: PubMed Central journal article supplement (PMC8397731; doi:10.1038/s41396-021-00962-6), 2021-04-01
Supplement: 41396_2021_962_MOESM6_ESM.pdf [file 41396_2021_962_MOESM6_ESM.pdf]

54

68

|                 |   |                       |                                                                |
|-----------------|---|-----------------------|----------------------------------------------------------------|
| Gster_LDH       | 1 | MKNNGG--ARVVVICA-CFV  | CASYVFALMNQGIADIEIVLIDANESKAIGDAM--DFNHGKVFAP--KPVDI-WHG DYDDC |
| Tth_LDH         | 1 | -----MKVIGVGS-GMVG    | SATAYALALLGVAREVVLVLDLRKLAQAHAEE--DILHATPFA---HPVWVRA-GSYGDL   |
| Blon_LDH        | 1 | MAETTVKPTKAVIICA-GAVG | STLFAAAQRGIAREIVLEDTAKERVEAEVL--DMQHGSSFY---PTVSDIGSDDPEIC     |
| Ctep_MDH        | 1 | -----MKITVIGA-GNVG    | GATTAFLRAEKQLARELVLVDVVEGIPQGKAL--DMYHSGPVL--FDTKVTSNDYADT     |
| Nvie_MDH        | 1 | -----MTITVIGS-GKVG    | CASAALNCGLRELDL--ILLLDIVOGLPQGEAM--DINHQLSERG--SDSVARGSN NYEDM |
| Nmar_MDH        | 1 | -----MTITIGS-GKVG     | GDAALFSALKRLDDQILLLDVAEGLPQGEAM--DINHMLSEQG--IDVEIKGSNNFEDM    |
| Nkor_MDH        | 1 | -----MTITIGS-GKVG     | GDAALFSALKRLDDQILLLDVAEGLPQGEAM--DINHMLSEQG--IDVEIKGSNNFEDM    |
| NPMRtheta1_MDH  | 1 | -----MTITIGA-GKVG     | GGAALFSALRNLDLDDQILLLDIVEGLPQGEAM--DINHALSEQG--IDVEIKGSNDYS DM |
| NPMRtheta5_MDH  | 1 | -----MTITIGA-GKVG     | GGAALFSALRNLDLDDQILLLDIVEGLPQGEAM--DINHALSEQG--IDVEIKGSNDYS DM |
| NPMRtheta2_MDH  | 1 | -----VTITIGA-GKVG     | GDAALFSALRNLDLDDQILLLDIVKGLPQGEAM--DINHALSEQG--IDVEIKGSNDYS DM |
| YK1312theta_MDH | 1 | -----MTITIGA-GKVG     | GGAALFSALKKLDLDDQILLLDIEGLPQGEAM--DINHMLSEQG--IDVEIKGSNDYS DM  |
| NPMRtheta4_MDH  | 1 | -----MTITIGA-GKVG     | GGAALFSALKKLDLDDQILLLDIEGLPQGEAM--DINHMLSEQG--IDVEIKGSNDYS DM  |
| Nbrev_MDH       | 1 | -----MTITIGA-GKVG     | GDAALFSALRRLDLDDQILLLDIAEGLPQGEAM--DINHMLSEQG--IDVNVKGSNNYEDM  |
| NPMRdelta3_MDH  | 1 | -----MTITIGS-GKVG     | GGAALFTALKKLDLDDQILLLDVVKGLPQGEAM--DINHALSEQG--VDVEIIGSNDYS DM |
| NPMRdelta2_MDH  | 1 | -----MTITIGS-GKVG     | GGAALFTALKKLDLDDQILLLDIVKGLPQGEAM--DINHSLSELG--IDVEIIGSNDYS DM |
| NPMRdelta1_MDH  | 1 | -----MTITIGA-GKVG     | GDAALFSALKRLDDQILLLDIEGLPQGEAM--DINHMLSEQG--IDVNVKGSNNYEDM     |
| YK1309iota_MDH  | 1 | -----MTITIGA-GKVG     | GAAAISIALRNLSDEILLLDVIKGLPEGEAM--DINHMLSEKG--INVDVRSNDYS DI    |
| Nuzo_MDH        | 1 | -----MTITIGS-GKVG     | GDAALFSALKRVKDKDILLLDVVNGLPQGEAM--DINHMLSEQG--VDVHIRGSNDYADM   |
| Mjan_MDH        | 1 | -----MKVITIGASGRV     | GATALLAKEPFMKDLVLIGREHSINKLEGLREIDYDALAGRTRSDANIYVESDENLRII    |
| Iisl_MDH        | 1 | MARI---PYKAVIGT       | GCATFATYMAVVPGIARMTIIVVVPGLAKGVM--DIKHAALVFR--RSVITKEAFDYSVKV  |
| Msed_MDH        | 1 | M-----AKVGFIGA-GKVG   | QTIAYSALVSGAVDEAVIYDIIPELPDKFEH--ELRHAFATKG--IKANVLGTNSLDDV    |

102

|                 |    |                  |                                                                   |
|-----------------|----|------------------|-------------------------------------------------------------------|
| Gster_LDH       | 73 | RDADLVVVICAGANQ  | PGETRLDLVDKNIAFRSIVESVMASGFQGLFVATNPVDILTYATWKFSGLPHERVIGSGTILD   |
| Tth_LDH         | 66 | EGARAVVLAAGVAQ   | PGETRLQLLDRNAQFAQVVPVLEAAPEAVLLVATNPVDMVTQVAYRLSGLPPGRVVGSGTILD   |
| Blon_LDH        | 75 | RDADVVITAGPR     | PGQSRLELVGATVNLKAIMPNLVKVPNAIYMLITNPVDIATHVAQKLTGLPENQIFGSGTILD   |
| Ctep_MDH        | 68 | ANSDIVVITAGLPR   | PGMTRDILLSNAGVREVTGRIMEHSKNPIIVVVSNPDIMTHVAQKSGLPKERVIGMAVGLD     |
| Nvie_MDH        | 67 | RGS DYVVLVAGVGR  | PGMTRMDLLKINAGVKDVASKDATYAKDATVIVVTNPDPMTYLALKTIGAQKSKVMGMGMGLD   |
| Nmar_MDH        | 67 | KGSNI VVVVAGSGR  | PGMTRMDLLKINAGVKS SVVENKKYADDSMIIPVTNPDPMAIITYKVS GFDRSRVFGMGMLD  |
| Nkor_MDH        | 67 | KGSKI VVVVAGSGR  | PGMTRMDLLKINAGVKS SVVENKKYANDSMIIPVTNPDPMAIITYKVS GFDRSRVFGMGMLD  |
| NPMRtheta1_MDH  | 67 | KGSNI VVVVAGLGR  | PGMTRMDLLQKNAGVKS SVVENKKYADDSMIIPVTNPDPMAIICYKVS GFERNRVFGMGMLD  |
| NPMRtheta5_MDH  | 67 | KGSNI VVVVAGLGR  | PGMTRMDLLQKNAGVKS SVVENKKYADDSMIIPVTNPDPMAIICYKVS GFERNRVFGMGMLD  |
| NPMRtheta2_MDH  | 67 | KGSNI VVVVAGLGR  | PGMTRMDLLQKNAGVKS SVVENKKYADDSIIPVTNPDPMTYICYKVS GFERNRVFGMGMLD   |
| YK1312theta_MDH | 67 | KGS DI VVTVAGSGR | PGMTRMDLLKINAGVKS SVVENKKYANDAMIIPVTNPDPMAIICYKVS GFENRIFGMGMGLD  |
| NPMRtheta4_MDH  | 67 | KGS DI VVVVAGLGR | PGMTRMDLLQKNAGVKS SVVENKKYANDSMIIPVTNPDPMAIICYKVS GFENRIFGMGMGLD  |
| Nbrev_MDH       | 67 | KGSKI VVVVAGAGR  | PGMTRMDLLKINAGVKDVVGNKKFADDAMIIPVTNPDPMAQIAYKTS GFDRSRVFGMGMLD    |
| NPMRdelta3_MDH  | 67 | KDSKI VVIVAGSGR  | PGMTRMDLLKINAGVKDVVENKKYNSDALVVPVTNPDPMAHIAKTS GFERNRILGMGNMLD    |
| NPMRdelta2_MDH  | 67 | KNSKI VVVVAGSGR  | PGMTRMDLLKINAGVKDVVENKKYSKDSFIIPVTNPDPMAHIAKVS GFERNRIFGMGNMLD    |
| NPMRdelta1_MDH  | 67 | KGSEI VVVVAGSGR  | PGMTRMDLLKINAGVKDV TENKKYANNSSIIPVTNPDPMAIVAFKVS GFENRIVGMGNMLD   |
| YK1309iota_MDH  | 67 | KGSEI VVVVAGSGR  | PGMTRMDLLKINAGVKDV TENKKYANNSSIIPVTNPDPMAIVAFKVS GFENRIVGMGNMLD   |
| Nuzo_MDH        | 67 | KGS DI VVVVAGSGR | PGMTRMDLLKINAGVKDVVENKKHASNAIIPVTNPDPMVHITYKTS GFEP SRIVGMGNMLD   |
| Mjan_MDH        | 73 | DES DVVITISVPR   | EGMSRMDLAKTNAKIVGKYAKKAEICDTKIF-VITNPVDMTYKALVDSKFERNQVFLGTSLD    |
| Iisl_MDH        | 73 | ENADAVITAKPR     | ADMSRDLANVAQIIRDIGDKDRNPGALYVVVTNPVDMTMVLDVIG-SKGTVITGTHLD        |
| Msed_MDH        | 69 | SGMDI VVISAQKPR  | PGMSRDLDFVDNAKIMIDLAKQLPSKNPGAIYLMVANPVDMMASVFMKY---SKQFTISAGDQVE |

171

199

|                 |     |                          |                                                            |
|-----------------|-----|--------------------------|------------------------------------------------------------|
| Gster_LDH       | 153 | TARFRFLGGEYFVAPQNVHAY    | IIGBHGDTLPLVWSQAYIGVMPRLKLVESKGE--AQKDLERI FVNVRDAAYQIIE-- |
| Tth_LDH         | 146 | TAFRALLAEYLRVAPQSVHAY    | VLGBHGDSVVLVWSSAQVGGVPLEFAEARGRA-LSPEDRARI DEGVBRAYRIIE--  |
| Blon_LDH        | 155 | SARLRFLTAQQTGVNVKNVHAY   | IAGBHGDSVPLWESATIGGVPMCDWTPPLPGHDPDADKREEIHQEVKNAAKYIIN--  |
| Ctep_MDH        | 148 | SABFRSFIAMELGVSMDVTACV   | VLGBHGDDAMPVVKYTTVAGIPVADL-----ISAERIAELVERTBTGGAEIVNHL    |
| Nvie_MDH        | 147 | LSRFRSYIQEATGVS RDSIQAMV | ISBHGDNMLPLTRFSSIGGIPLHDF-----ITKEQATDI FEKTKKVAEEVIA--    |
| Nmar_MDH        | 147 | LSRFRQFIHEATGHSRDSIRAL   | VIGBHGDNMLPLPRFSSVSGIPLPSL-----LPKKELELVQNTKQVAAKVIE--     |
| Nkor_MDH        | 147 | LSRFRQFIHEATGHSRDSIRAL   | VIGBHGDNMLPLPRFSSVSGIPLSSF-----LPKQKLELVQNTKQVAAKVIE--     |
| NPMRtheta1_MDH  | 147 | LSRFRQFIHEATGHSRHSIRAL   | VIGBHGDNMLPLPRFSSVSGIPLTSL-----LSKEKLELVQNTKQVAAKVIE--     |
| NPMRtheta5_MDH  | 147 | LSRFRQFIHEATGHSRHSIRAL   | VIGBHGDNMLPLPRFSSVSGIPLTSL-----LPKEKLELVQNTKQVAAKVIE--     |
| NPMRtheta2_MDH  | 147 | LSRFRQFIHEATGHSRHSIRAL   | VIGBHGDNMLPLPRFSSVSGIPLTSL-----LSKEKLELVQNTKQVAAKVIE--     |
| YK1312theta_MDH | 147 | LSRFRQFIHEATGHSRDSIRAL   | VIGBHGDNMLPLPRFSSVSGIPLTSL-----LSKEKLELVQNTKQVAAKVIE--     |
| NPMRtheta4_MDH  | 147 | LSRFRQFIHEATGYSRDSIRAL   | VIGBHGDNMLPLPRFSSVAGIPLVSL-----LSKEKLELVQNTKQIAAKVIE--     |
| Nbrev_MDH       | 147 | LSRFRQFIHEATGYSRESTKAL   | VIGBHGDNMLPLTRFATVSGIPLPTL-----LPKEKLELFTATKGVAAEVK--      |
| NPMRdelta3_MDH  | 147 | LSRFSQFIHEATGQSRESIRAL   | VIGBHGDNMLPLIRFSSVSGIPLTSL-----LAKDKLELEKNTKQVAAKVIE--     |
| NPMRdelta2_MDH  | 147 | LSRFTQFIHEATGYSRQSIRAL   | VIGBHGDNMLPLMRFSSVSGIPLTSL-----LSKEKLELEKNTKQVAAKVIE--     |
| NPMRdelta1_MDH  | 147 | LSRFRQFIHESTGFSRDSIRAL   | VIGBHGDNMPLPRFSSVAGIPLMSL-----LSKEKLELVVSTREVAAKVIE--      |
| YK1309iota_MDH  | 147 | LSRFRQFIHESTGFSRDSIRAL   | VIGBHGDNMPLPRFSSVAGIPLMSL-----LPKEKLELVVSTREVAAKVIE--      |
| Nuzo_MDH        | 147 | LSRFRQFIHESTGHSRDSIRAL   | VIGBHGDNMLPLPRFSTVSGIPLASI-----LPKEKLDQIVKDKTRGVAAKVIE--   |
| Mjan_MDH        | 152 | SLRFRKVAIAKFFGVHIDEVTR   | RIIGBHGDSMVPLLSATSGGIPQKFER-----FKELPDEIIEVDKTKGEQIR--     |
| Iisl_MDH        | 152 | TFRFRAAVELLNVP IVAVDGY   | VVGBHGDEAFVAWSTVTKGIHQYIKERNIN-ISR---EQLEKYVKDVAASIJA--    |
| Msed_MDH        | 146 | TMRFRSFIKAKKLIKIPVTSVD   | GVGBHGDEAVVLVSTVKIKGKPVDEFN-----INK---DEVSDYVKKIPGEIR--    |

|                        |     |                                                                                                                                                                                                                                                                                                                                                                                                                                                                                                                                                                                                                                                                                                    |
|------------------------|-----|----------------------------------------------------------------------------------------------------------------------------------------------------------------------------------------------------------------------------------------------------------------------------------------------------------------------------------------------------------------------------------------------------------------------------------------------------------------------------------------------------------------------------------------------------------------------------------------------------------------------------------------------------------------------------------------------------|
| Gster_LDH              | 229 | <b>K</b> <b>G</b> <b>G</b> <b>A</b> <b>T</b> <b>Y</b> <b>G</b> <b>I</b> <b>M</b> <b>G</b> <b>L</b> <b>A</b> <b>R</b> <b>T</b> <b>R</b> <b>A</b> <b>I</b> <b>L</b> <b>H</b> <b>N</b> <b>E</b> <b>N</b> <b>A</b> <b>L</b> <b>T</b> <b>V</b> <b>S</b> <b>A</b> <b>Y</b> <b>L</b> <b>D</b> <b>G</b> <b>L</b> <b>Y</b> <b>-</b> <b>G</b> <b>E</b> <b>R</b> <b>D</b> <b>V</b> <b>Y</b> <b>G</b> <b>V</b> <b>P</b> <b>A</b> <b>V</b> <b>N</b> <b>R</b> <b>N</b> <b>G</b> <b>R</b> <b>E</b> <b>V</b> <b>I</b> <b>E</b> <b>I</b> <b>E</b> <b>L</b> <b>N</b> <b>D</b> <b>D</b> <b>E</b> <b>K</b> <b>N</b> <b>R</b> <b>F</b> <b>H</b> <b>S</b> <b>A</b> <b>A</b> <b>T</b> <b>L</b>                            |
| Tth_LDH                | 223 | <b>G</b> <b>K</b> <b>G</b> <b>A</b> <b>T</b> <b>Y</b> <b>G</b> <b>I</b> <b>A</b> <b>G</b> <b>L</b> <b>A</b> <b>R</b> <b>V</b> <b>R</b> <b>A</b> <b>I</b> <b>L</b> <b>T</b> <b>D</b> <b>E</b> <b>K</b> <b>G</b> <b>Y</b> <b>T</b> <b>V</b> <b>S</b> <b>A</b> <b>F</b> <b>T</b> <b>P</b> <b>E</b> <b>V</b> <b>E</b> <b>-</b> <b>G</b> <b>V</b> <b>L</b> <b>E</b> <b>V</b> <b>S</b> <b>S</b> <b>L</b> <b>P</b> <b>R</b> <b>I</b> <b>L</b> <b>G</b> <b>A</b> <b>G</b> <b>G</b> <b>E</b> <b>G</b> <b>T</b> <b>V</b> <b>Y</b> <b>P</b> <b>S</b> <b>L</b> <b>S</b> <b>P</b> <b>E</b> <b>R</b> <b>E</b> <b>A</b> <b>L</b> <b>R</b> <b>R</b> <b>S</b> <b>A</b> <b>E</b> <b>I</b> <b>L</b>                   |
| Blon_LDH               | 233 | <b>G</b> <b>K</b> <b>G</b> <b>A</b> <b>T</b> <b>N</b> <b>Y</b> <b>A</b> <b>I</b> <b>C</b> <b>M</b> <b>S</b> <b>G</b> <b>V</b> <b>D</b> <b>I</b> <b>E</b> <b>A</b> <b>V</b> <b>L</b> <b>H</b> <b>D</b> <b>T</b> <b>N</b> <b>R</b> <b>L</b> <b>P</b> <b>V</b> <b>S</b> <b>S</b> <b>M</b> <b>L</b> <b>K</b> <b>D</b> <b>F</b> <b>H</b> <b>-</b> <b>G</b> <b>I</b> <b>S</b> <b>D</b> <b>I</b> <b>C</b> <b>S</b> <b>V</b> <b>P</b> <b>T</b> <b>L</b> <b>N</b> <b>R</b> <b>Q</b> <b>G</b> <b>N</b> <b>N</b> <b>T</b> <b>I</b> <b>N</b> <b>T</b> <b>P</b> <b>V</b> <b>S</b> <b>D</b> <b>K</b> <b>L</b> <b>A</b> <b>A</b> <b>L</b> <b>K</b> <b>R</b> <b>S</b> <b>A</b> <b>E</b> <b>T</b> <b>L</b>          |
| Ctep_MDH               | 220 | <b>K</b> <b>Q</b> <b>G</b> <b>S</b> <b>A</b> <b>F</b> <b>Y</b> <b>A</b> <b>P</b> <b>T</b> <b>S</b> <b>V</b> <b>V</b> <b>E</b> <b>V</b> <b>E</b> <b>S</b> <b>I</b> <b>V</b> <b>L</b> <b>D</b> <b>R</b> <b>K</b> <b>R</b> <b>V</b> <b>L</b> <b>T</b> <b>C</b> <b>A</b> <b>V</b> <b>S</b> <b>L</b> <b>D</b> <b>G</b> <b>Q</b> <b>Y</b> <b>-</b> <b>G</b> <b>I</b> <b>D</b> <b>G</b> <b>T</b> <b>F</b> <b>G</b> <b>V</b> <b>P</b> <b>V</b> <b>K</b> <b>G</b> <b>K</b> <b>N</b> <b>G</b> <b>E</b> <b>H</b> <b>I</b> <b>Y</b> <b>E</b> <b>I</b> <b>K</b> <b>L</b> <b>D</b> <b>S</b> <b>D</b> <b>L</b> <b>D</b> <b>L</b> <b>L</b> <b>Q</b> <b>K</b> <b>S</b> <b>A</b> <b>K</b> <b>I</b> <b>V</b>          |
| Nvie_MDH               | 217 | <b>L</b> <b>K</b> <b>G</b> <b>A</b> <b>T</b> <b>V</b> <b>H</b> <b>A</b> <b>P</b> <b>C</b> <b>N</b> <b>A</b> <b>V</b> <b>A</b> <b>T</b> <b>I</b> <b>E</b> <b>S</b> <b>M</b> <b>A</b> <b>K</b> <b>D</b> <b>K</b> <b>K</b> <b>M</b> <b>I</b> <b>P</b> <b>V</b> <b>S</b> <b>A</b> <b>Y</b> <b>L</b> <b>D</b> <b>G</b> <b>Q</b> <b>Y</b> <b>-</b> <b>G</b> <b>V</b> <b>S</b> <b>D</b> <b>L</b> <b>C</b> <b>G</b> <b>V</b> <b>P</b> <b>A</b> <b>V</b> <b>G</b> <b>A</b> <b>G</b> <b>G</b> <b>E</b> <b>K</b> <b>I</b> <b>V</b> <b>E</b> <b>L</b> <b>K</b> <b>L</b> <b>D</b> <b>S</b> <b>F</b> <b>Q</b> <b>Q</b> <b>V</b> <b>F</b> <b>D</b> <b>K</b> <b>G</b> <b>V</b> <b>A</b> <b>S</b> <b>V</b>          |
| Nmar_MDH               | 217 | <b>L</b> <b>K</b> <b>G</b> <b>A</b> <b>T</b> <b>V</b> <b>H</b> <b>A</b> <b>P</b> <b>C</b> <b>N</b> <b>A</b> <b>I</b> <b>S</b> <b>A</b> <b>V</b> <b>E</b> <b>A</b> <b>V</b> <b>R</b> <b>D</b> <b>R</b> <b>K</b> <b>O</b> <b>I</b> <b>P</b> <b>V</b> <b>A</b> <b>T</b> <b>Y</b> <b>L</b> <b>D</b> <b>G</b> <b>E</b> <b>Y</b> <b>-</b> <b>D</b> <b>H</b> <b>S</b> <b>D</b> <b>V</b> <b>T</b> <b>G</b> <b>V</b> <b>P</b> <b>A</b> <b>V</b> <b>G</b> <b>K</b> <b>N</b> <b>G</b> <b>E</b> <b>K</b> <b>I</b> <b>I</b> <b>E</b> <b>L</b> <b>D</b> <b>N</b> <b>D</b> <b>E</b> <b>K</b> <b>Q</b> <b>V</b> <b>F</b> <b>N</b> <b>K</b> <b>A</b> <b>V</b> <b>E</b> <b>N</b> <b>V</b>                            |
| Nkor_MDH               | 217 | <b>L</b> <b>K</b> <b>G</b> <b>A</b> <b>T</b> <b>V</b> <b>H</b> <b>A</b> <b>P</b> <b>C</b> <b>N</b> <b>A</b> <b>I</b> <b>S</b> <b>A</b> <b>V</b> <b>E</b> <b>A</b> <b>V</b> <b>R</b> <b>D</b> <b>R</b> <b>K</b> <b>O</b> <b>I</b> <b>P</b> <b>V</b> <b>A</b> <b>T</b> <b>Y</b> <b>L</b> <b>D</b> <b>G</b> <b>E</b> <b>Y</b> <b>-</b> <b>G</b> <b>H</b> <b>S</b> <b>D</b> <b>V</b> <b>T</b> <b>G</b> <b>V</b> <b>P</b> <b>A</b> <b>V</b> <b>G</b> <b>K</b> <b>K</b> <b>G</b> <b>E</b> <b>K</b> <b>I</b> <b>I</b> <b>E</b> <b>L</b> <b>D</b> <b>N</b> <b>A</b> <b>E</b> <b>K</b> <b>Q</b> <b>L</b> <b>F</b> <b>D</b> <b>A</b> <b>G</b> <b>I</b> <b>Q</b> <b>N</b> <b>V</b>                            |
| <b>NPMRtheta1_MDH</b>  | 217 | <b>L</b> <b>K</b> <b>G</b> <b>A</b> <b>T</b> <b>V</b> <b>H</b> <b>A</b> <b>P</b> <b>C</b> <b>N</b> <b>G</b> <b>I</b> <b>S</b> <b>A</b> <b>I</b> <b>D</b> <b>S</b> <b>V</b> <b>V</b> <b>N</b> <b>D</b> <b>K</b> <b>K</b> <b>O</b> <b>L</b> <b>P</b> <b>I</b> <b>A</b> <b>T</b> <b>Y</b> <b>L</b> <b>D</b> <b>G</b> <b>E</b> <b>Y</b> <b>-</b> <b>G</b> <b>Y</b> <b>S</b> <b>D</b> <b>V</b> <b>T</b> <b>G</b> <b>V</b> <b>P</b> <b>A</b> <b>V</b> <b>G</b> <b>K</b> <b>N</b> <b>G</b> <b>E</b> <b>K</b> <b>I</b> <b>I</b> <b>E</b> <b>L</b> <b>D</b> <b>N</b> <b>D</b> <b>E</b> <b>K</b> <b>E</b> <b>M</b> <b>F</b> <b>N</b> <b>K</b> <b>G</b> <b>I</b> <b>E</b> <b>S</b> <b>V</b>                   |
| <b>NPMRtheta5_MDH</b>  | 217 | <b>L</b> <b>K</b> <b>G</b> <b>A</b> <b>T</b> <b>V</b> <b>H</b> <b>A</b> <b>P</b> <b>C</b> <b>N</b> <b>G</b> <b>I</b> <b>S</b> <b>A</b> <b>I</b> <b>D</b> <b>S</b> <b>V</b> <b>V</b> <b>N</b> <b>D</b> <b>K</b> <b>K</b> <b>O</b> <b>L</b> <b>P</b> <b>I</b> <b>A</b> <b>T</b> <b>Y</b> <b>L</b> <b>D</b> <b>G</b> <b>E</b> <b>Y</b> <b>-</b> <b>G</b> <b>Y</b> <b>S</b> <b>D</b> <b>V</b> <b>T</b> <b>G</b> <b>V</b> <b>P</b> <b>A</b> <b>V</b> <b>G</b> <b>K</b> <b>N</b> <b>G</b> <b>E</b> <b>K</b> <b>I</b> <b>I</b> <b>E</b> <b>L</b> <b>D</b> <b>N</b> <b>D</b> <b>E</b> <b>K</b> <b>E</b> <b>M</b> <b>F</b> <b>N</b> <b>K</b> <b>G</b> <b>I</b> <b>E</b> <b>S</b> <b>V</b>                   |
| <b>NPMRtheta2_MDH</b>  | 217 | <b>L</b> <b>K</b> <b>G</b> <b>A</b> <b>T</b> <b>V</b> <b>H</b> <b>A</b> <b>P</b> <b>C</b> <b>N</b> <b>G</b> <b>I</b> <b>S</b> <b>T</b> <b>I</b> <b>D</b> <b>S</b> <b>V</b> <b>V</b> <b>N</b> <b>G</b> <b>K</b> <b>M</b> <b>O</b> <b>L</b> <b>P</b> <b>I</b> <b>A</b> <b>T</b> <b>Y</b> <b>L</b> <b>D</b> <b>G</b> <b>E</b> <b>Y</b> <b>-</b> <b>G</b> <b>Y</b> <b>S</b> <b>D</b> <b>V</b> <b>T</b> <b>G</b> <b>V</b> <b>P</b> <b>A</b> <b>V</b> <b>G</b> <b>K</b> <b>N</b> <b>G</b> <b>E</b> <b>K</b> <b>I</b> <b>I</b> <b>E</b> <b>L</b> <b>D</b> <b>N</b> <b>D</b> <b>E</b> <b>K</b> <b>E</b> <b>I</b> <b>F</b> <b>N</b> <b>K</b> <b>G</b> <b>I</b> <b>E</b> <b>S</b> <b>V</b>                   |
| <b>YK1312theta_MDH</b> | 217 | <b>L</b> <b>K</b> <b>G</b> <b>A</b> <b>T</b> <b>V</b> <b>H</b> <b>A</b> <b>P</b> <b>C</b> <b>N</b> <b>G</b> <b>I</b> <b>S</b> <b>S</b> <b>I</b> <b>D</b> <b>A</b> <b>V</b> <b>V</b> <b>N</b> <b>N</b> <b>R</b> <b>R</b> <b>K</b> <b>O</b> <b>I</b> <b>P</b> <b>V</b> <b>A</b> <b>T</b> <b>Y</b> <b>L</b> <b>D</b> <b>G</b> <b>E</b> <b>Y</b> <b>-</b> <b>G</b> <b>Y</b> <b>S</b> <b>D</b> <b>V</b> <b>T</b> <b>G</b> <b>V</b> <b>P</b> <b>A</b> <b>V</b> <b>G</b> <b>R</b> <b>N</b> <b>G</b> <b>E</b> <b>K</b> <b>I</b> <b>V</b> <b>E</b> <b>L</b> <b>D</b> <b>N</b> <b>D</b> <b>E</b> <b>K</b> <b>S</b> <b>M</b> <b>F</b> <b>Q</b> <b>K</b> <b>G</b> <b>I</b> <b>E</b> <b>S</b> <b>I</b>          |
| <b>NPMRtheta4_MDH</b>  | 217 | <b>L</b> <b>K</b> <b>G</b> <b>A</b> <b>T</b> <b>V</b> <b>H</b> <b>A</b> <b>P</b> <b>C</b> <b>N</b> <b>G</b> <b>I</b> <b>S</b> <b>A</b> <b>I</b> <b>D</b> <b>S</b> <b>I</b> <b>V</b> <b>N</b> <b>N</b> <b>R</b> <b>K</b> <b>O</b> <b>L</b> <b>P</b> <b>V</b> <b>A</b> <b>T</b> <b>C</b> <b>L</b> <b>D</b> <b>G</b> <b>E</b> <b>Y</b> <b>-</b> <b>G</b> <b>Q</b> <b>S</b> <b>D</b> <b>I</b> <b>T</b> <b>G</b> <b>V</b> <b>P</b> <b>A</b> <b>V</b> <b>G</b> <b>K</b> <b>K</b> <b>G</b> <b>E</b> <b>K</b> <b>I</b> <b>I</b> <b>E</b> <b>L</b> <b>D</b> <b>N</b> <b>E</b> <b>E</b> <b>K</b> <b>D</b> <b>W</b> <b>F</b> <b>N</b> <b>K</b> <b>G</b> <b>I</b> <b>V</b> <b>S</b> <b>V</b>                   |
| Nbrev_MDH              | 217 | <b>L</b> <b>K</b> <b>G</b> <b>A</b> <b>T</b> <b>V</b> <b>H</b> <b>A</b> <b>P</b> <b>C</b> <b>N</b> <b>A</b> <b>I</b> <b>S</b> <b>A</b> <b>V</b> <b>E</b> <b>S</b> <b>V</b> <b>Q</b> <b>D</b> <b>K</b> <b>K</b> <b>O</b> <b>I</b> <b>P</b> <b>V</b> <b>S</b> <b>T</b> <b>N</b> <b>L</b> <b>D</b> <b>G</b> <b>E</b> <b>Y</b> <b>-</b> <b>G</b> <b>Q</b> <b>K</b> <b>D</b> <b>V</b> <b>S</b> <b>G</b> <b>V</b> <b>P</b> <b>A</b> <b>V</b> <b>G</b> <b>K</b> <b>K</b> <b>G</b> <b>E</b> <b>K</b> <b>I</b> <b>E</b> <b>L</b> <b>E</b> <b>L</b> <b>N</b> <b>D</b> <b>E</b> <b>K</b> <b>E</b> <b>W</b> <b>F</b> <b>N</b> <b>K</b> <b>G</b> <b>V</b> <b>D</b> <b>S</b> <b>V</b>                            |
| <b>NPMRdelta3_MDH</b>  | 217 | <b>L</b> <b>K</b> <b>G</b> <b>A</b> <b>T</b> <b>V</b> <b>H</b> <b>A</b> <b>P</b> <b>C</b> <b>N</b> <b>A</b> <b>I</b> <b>S</b> <b>S</b> <b>I</b> <b>E</b> <b>S</b> <b>V</b> <b>R</b> <b>D</b> <b>K</b> <b>K</b> <b>O</b> <b>M</b> <b>P</b> <b>V</b> <b>S</b> <b>T</b> <b>P</b> <b>L</b> <b>N</b> <b>G</b> <b>E</b> <b>Y</b> <b>-</b> <b>G</b> <b>Y</b> <b>S</b> <b>D</b> <b>V</b> <b>T</b> <b>G</b> <b>V</b> <b>P</b> <b>A</b> <b>V</b> <b>G</b> <b>K</b> <b>N</b> <b>G</b> <b>E</b> <b>K</b> <b>I</b> <b>I</b> <b>E</b> <b>L</b> <b>D</b> <b>N</b> <b>D</b> <b>E</b> <b>K</b> <b>D</b> <b>W</b> <b>F</b> <b>R</b> <b>K</b> <b>S</b> <b>V</b> <b>D</b> <b>S</b> <b>V</b>                            |
| <b>NPMRdelta2_MDH</b>  | 217 | <b>L</b> <b>K</b> <b>G</b> <b>A</b> <b>T</b> <b>V</b> <b>H</b> <b>A</b> <b>P</b> <b>C</b> <b>N</b> <b>A</b> <b>I</b> <b>S</b> <b>S</b> <b>I</b> <b>E</b> <b>S</b> <b>V</b> <b>R</b> <b>N</b> <b>Q</b> <b>R</b> <b>R</b> <b>O</b> <b>I</b> <b>P</b> <b>V</b> <b>A</b> <b>T</b> <b>P</b> <b>L</b> <b>D</b> <b>G</b> <b>E</b> <b>Y</b> <b>-</b> <b>G</b> <b>Y</b> <b>S</b> <b>D</b> <b>V</b> <b>T</b> <b>G</b> <b>V</b> <b>P</b> <b>A</b> <b>V</b> <b>G</b> <b>K</b> <b>N</b> <b>G</b> <b>E</b> <b>K</b> <b>I</b> <b>I</b> <b>Q</b> <b>L</b> <b>D</b> <b>E</b> <b>K</b> <b>E</b> <b>W</b> <b>I</b> <b>K</b> <b>K</b> <b>S</b> <b>V</b> <b>E</b> <b>S</b> <b>V</b>                                     |
| <b>NPMRiota1_MDH</b>   | 217 | <b>L</b> <b>K</b> <b>G</b> <b>A</b> <b>T</b> <b>V</b> <b>H</b> <b>A</b> <b>P</b> <b>C</b> <b>N</b> <b>G</b> <b>I</b> <b>S</b> <b>A</b> <b>I</b> <b>V</b> <b>E</b> <b>S</b> <b>I</b> <b>V</b> <b>R</b> <b>D</b> <b>T</b> <b>K</b> <b>O</b> <b>I</b> <b>P</b> <b>V</b> <b>A</b> <b>T</b> <b>Y</b> <b>L</b> <b>D</b> <b>G</b> <b>E</b> <b>Y</b> <b>-</b> <b>G</b> <b>F</b> <b>S</b> <b>D</b> <b>V</b> <b>T</b> <b>G</b> <b>V</b> <b>P</b> <b>A</b> <b>V</b> <b>G</b> <b>K</b> <b>N</b> <b>G</b> <b>E</b> <b>K</b> <b>I</b> <b>I</b> <b>E</b> <b>L</b> <b>D</b> <b>N</b> <b>D</b> <b>S</b> <b>S</b> <b>E</b> <b>K</b> <b>E</b> <b>-----</b>                                                            |
| <b>YK1309iota_MDH</b>  | 217 | <b>L</b> <b>K</b> <b>G</b> <b>A</b> <b>T</b> <b>V</b> <b>H</b> <b>A</b> <b>P</b> <b>C</b> <b>N</b> <b>G</b> <b>I</b> <b>S</b> <b>V</b> <b>V</b> <b>E</b> <b>S</b> <b>I</b> <b>V</b> <b>R</b> <b>D</b> <b>T</b> <b>K</b> <b>O</b> <b>I</b> <b>P</b> <b>V</b> <b>A</b> <b>T</b> <b>Y</b> <b>L</b> <b>D</b> <b>G</b> <b>E</b> <b>Y</b> <b>-</b> <b>G</b> <b>F</b> <b>S</b> <b>D</b> <b>V</b> <b>T</b> <b>G</b> <b>V</b> <b>P</b> <b>A</b> <b>V</b> <b>G</b> <b>K</b> <b>N</b> <b>G</b> <b>E</b> <b>K</b> <b>I</b> <b>I</b> <b>E</b> <b>L</b> <b>D</b> <b>N</b> <b>D</b> <b>S</b> <b>S</b> <b>E</b> <b>K</b> <b>E</b> <b>W</b> <b>F</b> <b>K</b> <b>K</b> <b>G</b> <b>V</b> <b>D</b> <b>S</b> <b>V</b> |
| Nuzo_MDH               | 217 | <b>L</b> <b>K</b> <b>G</b> <b>A</b> <b>T</b> <b>V</b> <b>H</b> <b>A</b> <b>P</b> <b>C</b> <b>N</b> <b>A</b> <b>I</b> <b>S</b> <b>A</b> <b>V</b> <b>E</b> <b>A</b> <b>I</b> <b>K</b> <b>D</b> <b>R</b> <b>K</b> <b>K</b> <b>O</b> <b>I</b> <b>P</b> <b>V</b> <b>A</b> <b>T</b> <b>P</b> <b>L</b> <b>T</b> <b>G</b> <b>Q</b> <b>Y</b> <b>-</b> <b>G</b> <b>H</b> <b>S</b> <b>D</b> <b>V</b> <b>T</b> <b>G</b> <b>V</b> <b>P</b> <b>A</b> <b>V</b> <b>G</b> <b>R</b> <b>K</b> <b>G</b> <b>E</b> <b>K</b> <b>I</b> <b>I</b> <b>E</b> <b>L</b> <b>D</b> <b>N</b> <b>S</b> <b>E</b> <b>K</b> <b>E</b> <b>W</b> <b>F</b> <b>E</b> <b>K</b> <b>G</b> <b>V</b> <b>N</b> <b>S</b> <b>V</b>                   |
| Mjan_MDH               | 224 | <b>L</b> <b>K</b> <b>G</b> <b>G</b> <b>S</b> <b>E</b> <b>F</b> <b>G</b> <b>P</b> <b>A</b> <b>A</b> <b>I</b> <b>L</b> <b>N</b> <b>V</b> <b>R</b> <b>C</b> <b>I</b> <b>V</b> <b>N</b> <b>N</b> <b>E</b> <b>K</b> <b>R</b> <b>L</b> <b>T</b> <b>L</b> <b>S</b> <b>A</b> <b>Y</b> <b>V</b> <b>D</b> <b>G</b> <b>E</b> <b>F</b> <b>D</b> <b>G</b> <b>I</b> <b>R</b> <b>D</b> <b>V</b> <b>C</b> <b>G</b> <b>V</b> <b>P</b> <b>V</b> <b>K</b> <b>G</b> <b>R</b> <b>D</b> <b>G</b> <b>E</b> <b>E</b> <b>V</b> <b>V</b> <b>S</b> <b>I</b> <b>E</b> <b>L</b> <b>D</b> <b>K</b> <b>D</b> <b>I</b> <b>I</b> <b>A</b> <b>F</b> <b>R</b> <b>K</b> <b>S</b> <b>A</b> <b>E</b> <b>I</b> <b>I</b>                   |
| Iisl_MDH               | 226 | <b>S</b> <b>Q</b> <b>G</b> <b>A</b> <b>T</b> <b>I</b> <b>W</b> <b>G</b> <b>P</b> <b>A</b> <b>T</b> <b>F</b> <b>Q</b> <b>E</b> <b>V</b> <b>V</b> <b>S</b> <b>H</b> <b>L</b> <b>A</b> <b>N</b> <b>E</b> <b>S</b> <b>K</b> <b>I</b> <b>P</b> <b>I</b> <b>S</b> <b>L</b> <b>P</b> <b>Q</b> <b>N</b> <b>I</b> <b>E</b> <b>-</b> <b>G</b> <b>V</b> <b>G</b> <b>R</b> <b>V</b> <b>A</b> <b>S</b> <b>V</b> <b>P</b> <b>T</b> <b>I</b> <b>S</b> <b>G</b> <b>R</b> <b>-</b> <b>K</b> <b>P</b> <b>L</b> <b>V</b> <b>Q</b> <b>L</b> <b>-</b> <b>I</b> <b>N</b> <b>E</b> <b>E</b> <b>Q</b> <b>E</b> <b>R</b> <b>L</b> <b>K</b> <b>R</b> <b>A</b> <b>A</b> <b>K</b> <b>A</b> <b>I</b>                            |
| Msed_MDH               | 214 | <b>V</b> <b>I</b> <b>G</b> <b>G</b> <b>T</b> <b>T</b> <b>W</b> <b>G</b> <b>P</b> <b>E</b> <b>T</b> <b>I</b> <b>I</b> <b>A</b> <b>D</b> <b>I</b> <b>K</b> <b>S</b> <b>I</b> <b>A</b> <b>F</b> <b>S</b> <b>E</b> <b>N</b> <b>R</b> <b>V</b> <b>M</b> <b>S</b> <b>I</b> <b>A</b> <b>T</b> <b>P</b> <b>--</b> <b>K</b> <b>E</b> <b>Y</b> <b>-</b> <b>E</b> <b>K</b> <b>E</b> <b>I</b> <b>I</b> <b>H</b> <b>S</b> <b>A</b> <b>P</b> <b>T</b> <b>V</b> <b>G</b> <b>S</b> <b>S</b> <b>-</b> <b>G</b> <b>P</b> <b>S</b> <b>L</b> <b>E</b> <b>S</b> <b>L</b> <b>D</b> <b>E</b> <b>K</b> <b>D</b> <b>R</b> <b>W</b> <b>H</b> <b>L</b> <b>N</b> <b>S</b> <b>A</b> <b>M</b> <b>K</b> <b>D</b> <b>F</b>         |

**Fig. S5.** Sequence alignment of lactate dehydrogenase (LDH) and malate dehydrogenase (MDH) homologs, shaded in yellow and green, respectively. Conserved residues are shaded in black and grey. The universally conserved in the LDH/MDH superfamily substrate binding Arg171 is indicated in red. Residues important for substrate discrimination and active site architecture are shaded in orange and discussed in the text. The residue determining the cofactor specificity is shaded in green. Residue numbering refers to the LDH numbering as in Roche *et al.* 2019.

Primary sequences from the following organisms were used to generate the alignment (Uniprot accession numbers in parentheses): Gster, *Geobacillus stearothermophilus* (P00344); Tth, *Thermus thermophilus* (Q5SJA1); Blon, *Bifidobacterium longum* (E8ME30); Ctep, *Chlorobaculum tepidum* (P80039); Nvie, *Nitrososphaera viennensis* (A0A060HG74); Nmar, *Nitrosopumilus maritimus* (A9A450); Nkor, *Nitrosarchaeum koreense* (F9CUM5); Nbrev, *Ca. Nitrosopelagicus brevis* (A0A0A7V4F4); Nuzo, *Ca. Nitrosotenuis uzonensis* (V6AR53); Mjan, *Methanocaldococcus jannaschii* (Q60176); Iisl, *Ignicoccus islandicus* (A0A0U3FQH7); Msed, *Metallosphaera sedula* (A4YDY0). Sequences from the marine sediment AOA MAGs reported in this study are in bold and their locus tags can be found in Table S3.
